# Supplementary material for: Antiprotozoal and Antiglycation Activities of Sesquiterpene Coumarins from Ferula narthex Exudate
Source: PubMed Central journal article supplement (PMC6274357; doi:10.3390/molecules21101287), 2016-09-26
Supplement: molecules-21-01287-s001.pdf [file molecules-21-01287-s001.pdf]

# Supplementary Materials: Antiprotozoal and Antiglycation Activities of Sesquiterpene Coumarins from *Ferula narthex* Exudate

Adnan Amin, Emmy Tuentler, Paul Cos, Louis Maes, Vassiliki Exarchou, Sandra Apers and Luc Pieters

## 1. Antiglycation Assay (BSA-Glucose Assay)

The antiglycation assay was performed according to the method developed by Matsuura et al. (2002) [1] with minor modifications. The reaction mixture (300  $\mu$ L) contained bovine serum albumin (BSA) (10 mg/mL, 135  $\mu$ L), D-glucose (500 mM, 135  $\mu$ L) dissolved in phosphate buffer (50 mM, pH 7.4, containing sodium azide (0.02%, added to prevent bacterial growth) and test compounds (30  $\mu$ L), at different final concentrations (1.5–0.023 mM for isolated constituents or 100–1.17  $\mu$ g/mL for extracts) dissolved in 100 % DMSO. The mixtures were incubated at 60 °C for 48 h. After incubation, the reaction mixture was allowed to cool down at room temperature. Then 100  $\mu$ L reaction mixture was transferred to a new plastic tube (1.5 mL) and the reaction was stopped by adding 10  $\mu$ L of 100% (*w/v*) trichloroacetic acid (TCA) and to precipitate proteins. The TCA-added mixture was kept at 4 °C for 10 min, followed by centrifugation (14,000 rpm, 4 °C, 4 min). The supernatant containing unreacted D-glucose, test sample and interfering substances was discarded, whereas the precipitate containing AGEs-BSA was redissolved with 0.8 mL alkaline PBS (137 mM NaCl, 8.1 mM Na<sub>2</sub>HPO<sub>4</sub>, 2.68 mM KCl, 1.47 mM KH<sub>2</sub>PO<sub>4</sub>, pH 10). The change in fluorescence intensity (excitation 335 nm, emission 385 nm; excitation 370, emission 440) due to formation of AGEs was monitored by spectrofluorometry (Tecan™ Infinite M200, Giessen, The Netherlands). In order to eliminate interference by autofluorescence of the test compounds, a parallel incubation of test substance with BSA at 60 °C without D-glucose was performed for all samples. Quercetin (0.5–0.0312 mM final concentration) and aminoguanidine (3–0.046 mM final concentration) were used as reference compounds.

## 2. The AGEs Inhibition was Calculated as

$$\% \text{ inhibition} = \{1 - (\text{FBSA} + \text{glucose} + \text{test substance} - \text{FBSA} + \text{test substance}) / (\text{FBSA} + \text{glucose} - \text{FBSA})\} \times 100 \quad (1)$$

where F is the fluorescence intensity. The concentration required for 50% inhibition (IC<sub>50</sub>) was calculated using using Sigma plot® 13.0.

## 3. Protein-Glyoxal Interaction (BSA-MGO Assay)

The antiglycation assay using methylglyoxal (MGO) was performed according to the method developed by Peng et al. (2007) [2] with slight modifications. Briefly, methylglyoxal (135  $\mu$ L, 5.75 mM) was incubated with BSA (135  $\mu$ L, 10 mg/mL) dissolved in phosphate buffer (50 mM, pH 7.4, containing sodium azide (0.02%), added to prevent bacterial growth) and test compounds (30  $\mu$ L) at different final concentrations (1.5–0.023 mM) in 100% DMSO. The reaction mixture was incubated at 37 °C for one week. Control solutions only contained methylglyoxal (135  $\mu$ L, 5.75 mM) BSA (135  $\mu$ L, 10 mg/mL) and DMSO (100%) only. The blank samples of similar composition were also prepared simultaneously and kept at 4 °C for one week. The change in fluorescence intensity (excitation 335 nm, emission 385 nm; excitation 370, emission 440) due to formation of AGEs was monitored by spectrofluorometry (Tecan® Infinite M200, Giessen, The Netherlands). Aminoguanidine (3–0.046 mM final concentration) was used as reference compound. The AGEs inhibition was calculated as

$$\% \text{ AGEs inhibition} = [1 - (S - S_b) / (C - C_b)] \times 100 \quad (2)$$

where S and C were fluorescence of test samples (in DMSO) and control (test mixtures containing only DMSO) incubated at 37 °C, and where Sb and Cb were fluorescence for samples incubated at 4 °C. The concentration required for 50% inhibition (IC<sub>50</sub>) was calculated using using Sigma plot® 13.0.

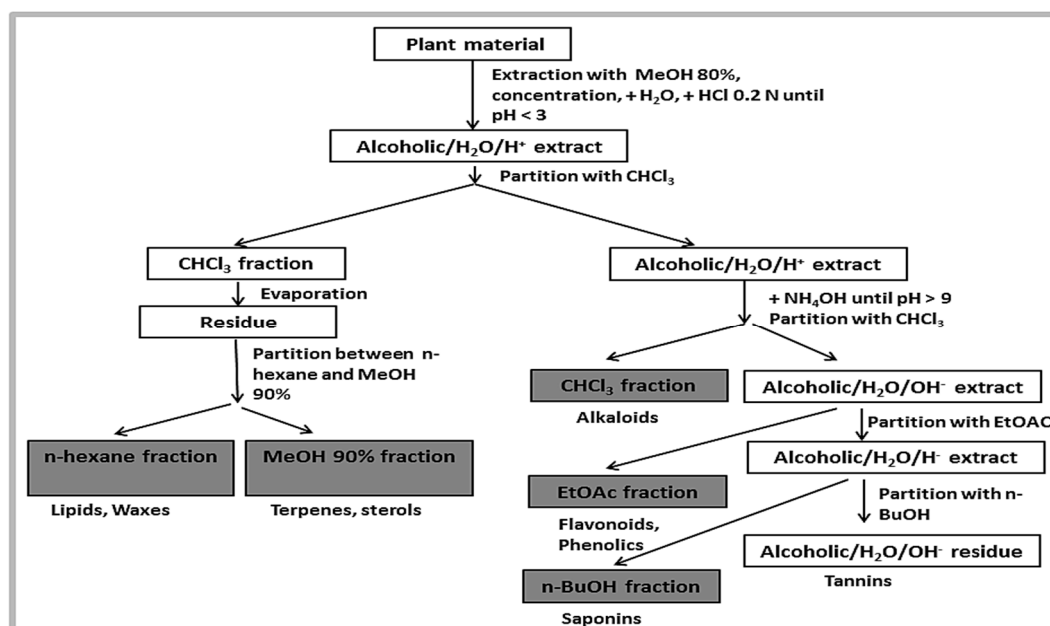

Scheme S1. Liquid-liquid extraction scheme.

Table S1. <sup>1</sup>H- and <sup>13</sup>C-NMR assignments of feselol (1) recorded in MeOH-d<sub>4</sub>

| Position | $\delta_{\text{H}}$ (ppm); Multiplicity; $J$ (Hz) | $\delta_{\text{C}}$ (ppm) |
|----------|---------------------------------------------------|---------------------------|
| 1        |                                                   |                           |
| 2        |                                                   | 163.4                     |
| 3        | 6.23; d; $J = 9.5$                                | 113.6                     |
| 4        | 7.87; d; $J = 9.5$                                | 145.9                     |
| 5        | 7.52; d; $J = 8.5$                                | 130.5                     |
| 6        | 6.91; br d; $J = 8.5$                             | 114.4                     |
| 7        |                                                   | 163.7                     |
| 8        | 6.93; br s                                        | 102.2                     |
| 9        |                                                   | 157.2                     |
| 10       |                                                   | 114.1                     |
| 1'       | 2.07; m                                           | 24.3                      |
| 2'       | 1.63; 0.92; m                                     | 28.0                      |
| 3'       | 3.23; dd; $J = 10.9; 4.5$                         | 79.6                      |
| 4'       |                                                   | 39.9                      |
| 5'       | 1.26; m                                           | 50.9                      |
| 6'       | 2.0; m                                            | 39.0                      |
| 7'       | 5.53; br s                                        | 124.5                     |
| 8'       |                                                   | 133.9                     |
| 9'       | 2.20; br s                                        | 55.4                      |
| 10'      |                                                   | 37.0                      |
| 11'      | 4.08; dd; $J = 10; 3.4$                           | 68.2                      |
|          | 4.24; dd; $J = 10; 5.8$                           |                           |
| 12'      | 1.69; s                                           | 21.8                      |
| 13'      | 0.87; s                                           | 15.3                      |
| 14'      | 0.98; s                                           | 28.7                      |
| 15'      | 0.93; s                                           | 15.9                      |

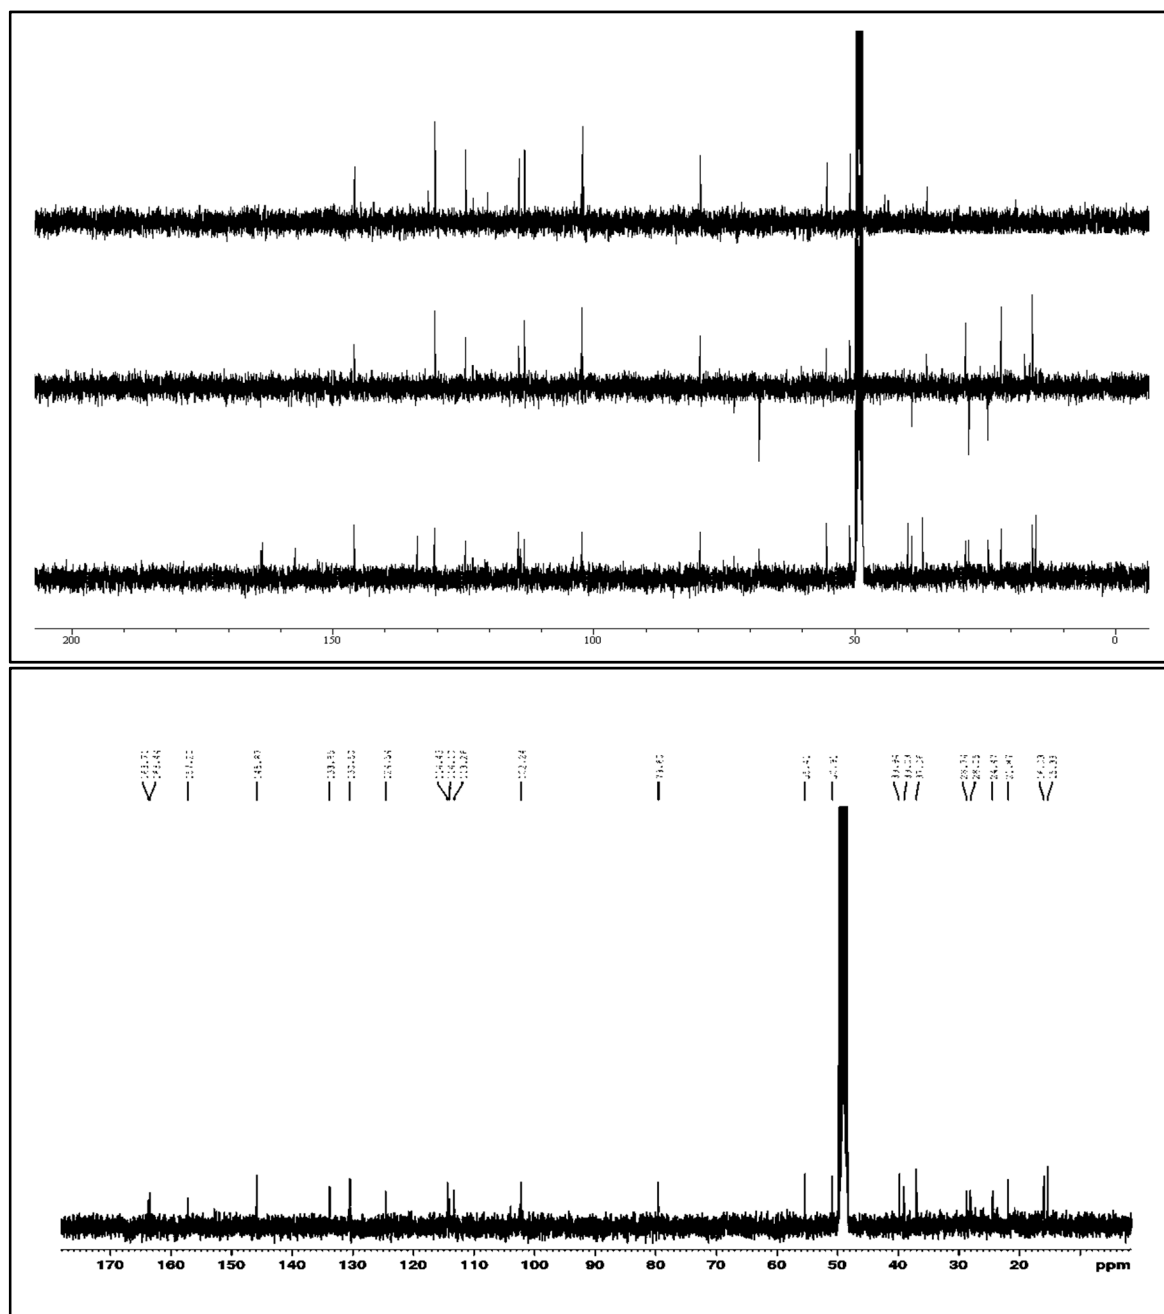

Figure S1.  $^{13}\text{C}$ -NMR, DEPT-135 and DEPT-90 spectra of feselol (1) recorded in  $\text{MeOH-}d_4$ .

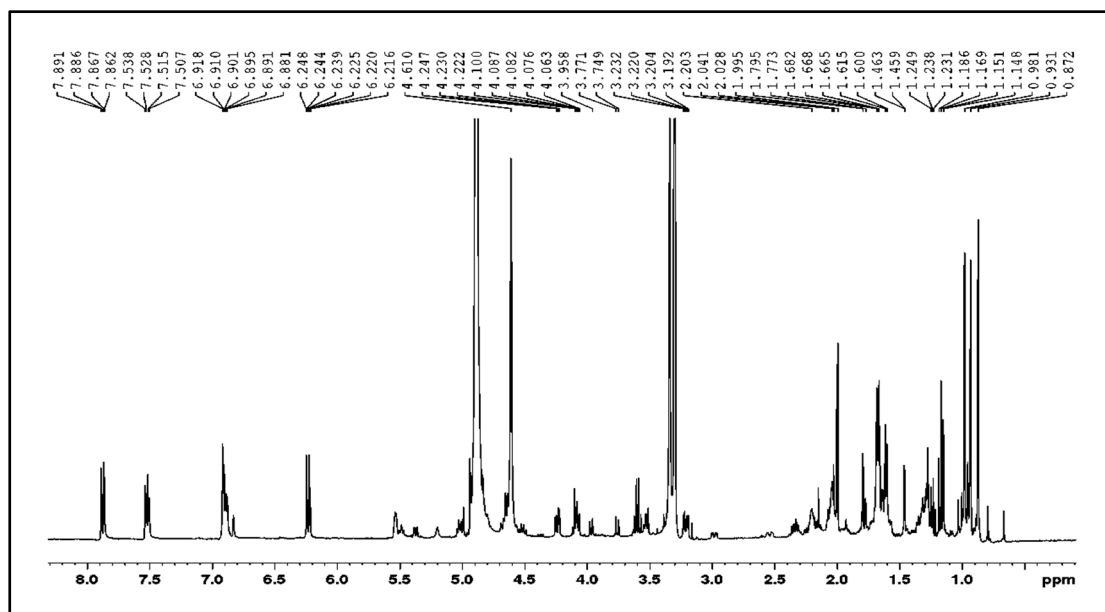

Figure S2.  $^1\text{H}$ -NMR spectrum of feselol (1) recorded in  $\text{MeOH-}d_4$ .

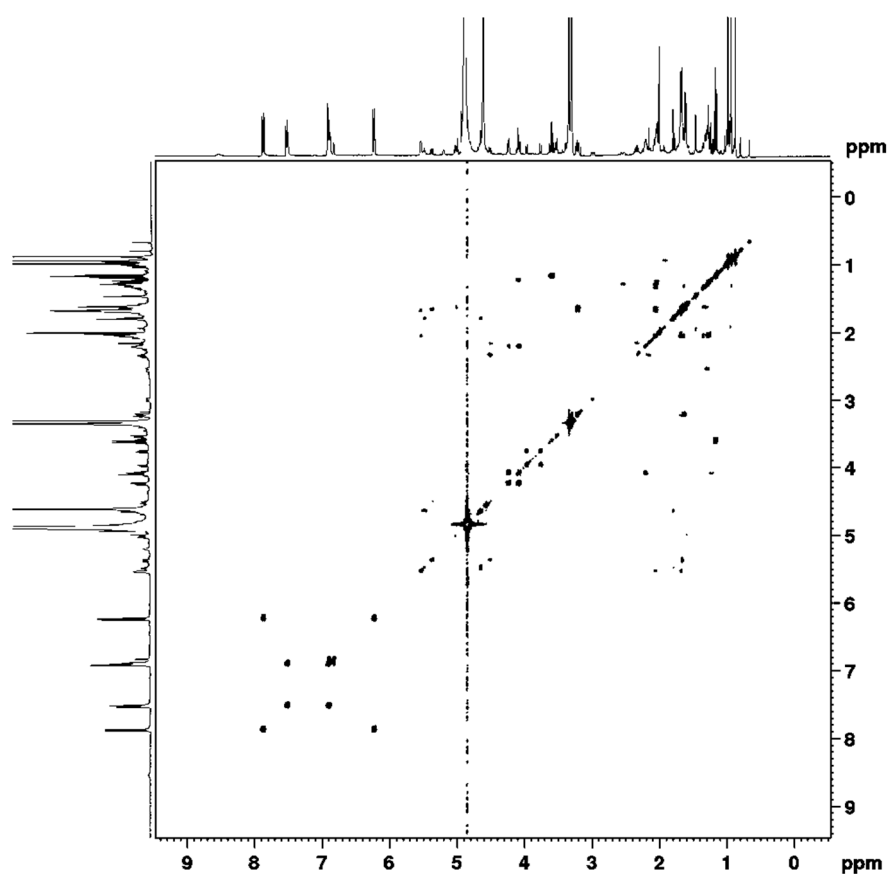

Figure S3. COSY spectrum of feselol (1) recorded in  $\text{MeOH-}d_4$ .

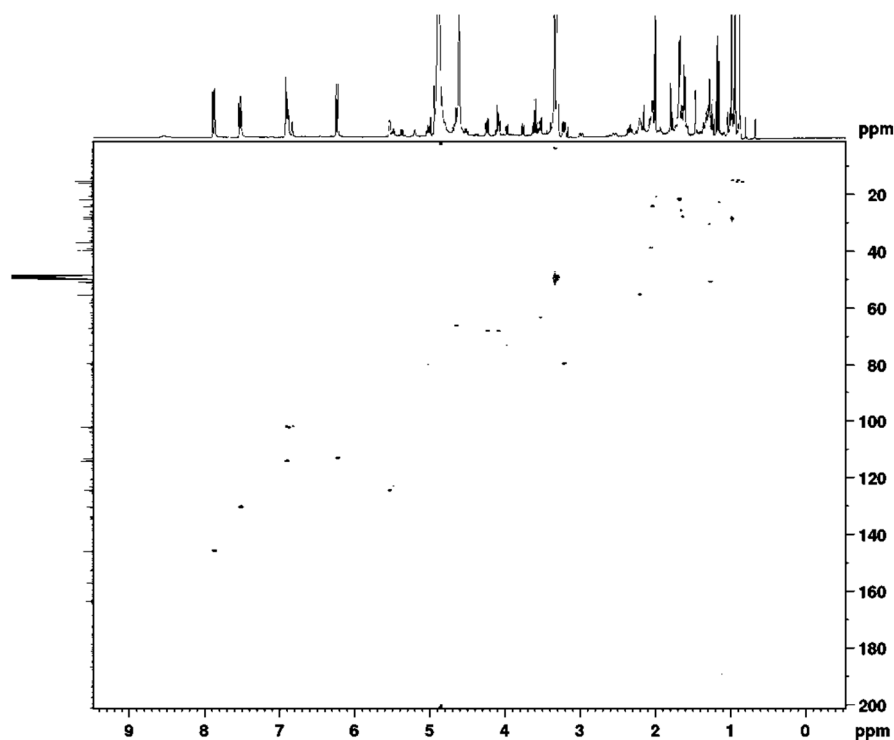

Figure S4. HSQC spectrum of feselol (1) recorded in MeOH- $d_4$ .

Table S2.  $^1\text{H}$ - and  $^{13}\text{C}$ -NMR assignments of ligupersin A (2) recorded in MeOH- $d_4$ .

| Position | $\delta_{\text{H}}$ (ppm); multiplicity; $J$ (Hz) | $\delta_{\text{C}}$ (ppm) |
|----------|---------------------------------------------------|---------------------------|
| 2        |                                                   | 163.3                     |
| 3        | 6.24; dd; $J = 9.5$                               | 114.0                     |
| 4        | 7.88; d; $J = 9.5$                                | 145.9                     |
| 5        | 7.84; d; $J = 8.5$                                | 130.7                     |
| 6        | 6.95; $J = 8.5; 2.5$                              | 114.5                     |
| 7        |                                                   | 163.5                     |
| 8        | 6.98; d; $J = 2.5$                                | 102.6                     |
| 9        |                                                   | 159.6                     |
| 10       |                                                   | 114.4                     |
| 1'       | 1.67; 2.06; m                                     | 38.5                      |
| 2'       | 1.65; 1.72; m                                     | 27.6                      |
| 3'       | 3.20; dd; $J = 11.0; 4.3$                         | 79.4                      |
| 4'       |                                                   | 39.1                      |
| 5'       | 2.33; s                                           | 63.7                      |
| 6'       |                                                   | 201.9                     |
| 7'       | 5.84; br s                                        | 130.1                     |
| 8'       |                                                   | 157.4                     |
| 9'       | 2.81; m                                           | 56.5                      |
| 10'      |                                                   | 43.6                      |
| 11'      | 4.32; dd; $J = 10.5, 5.2$                         | 67.1                      |
|          | 4.40; dd; $J = 10.5, 3.0$                         |                           |
| 12'      | 2.0; s                                            | 22.0                      |
| 13'      | 1.16; s                                           | 16.0                      |
| 14'      | 1.26; s                                           | 29.1                      |
| 15'      | 1.06; s                                           | 16.7                      |

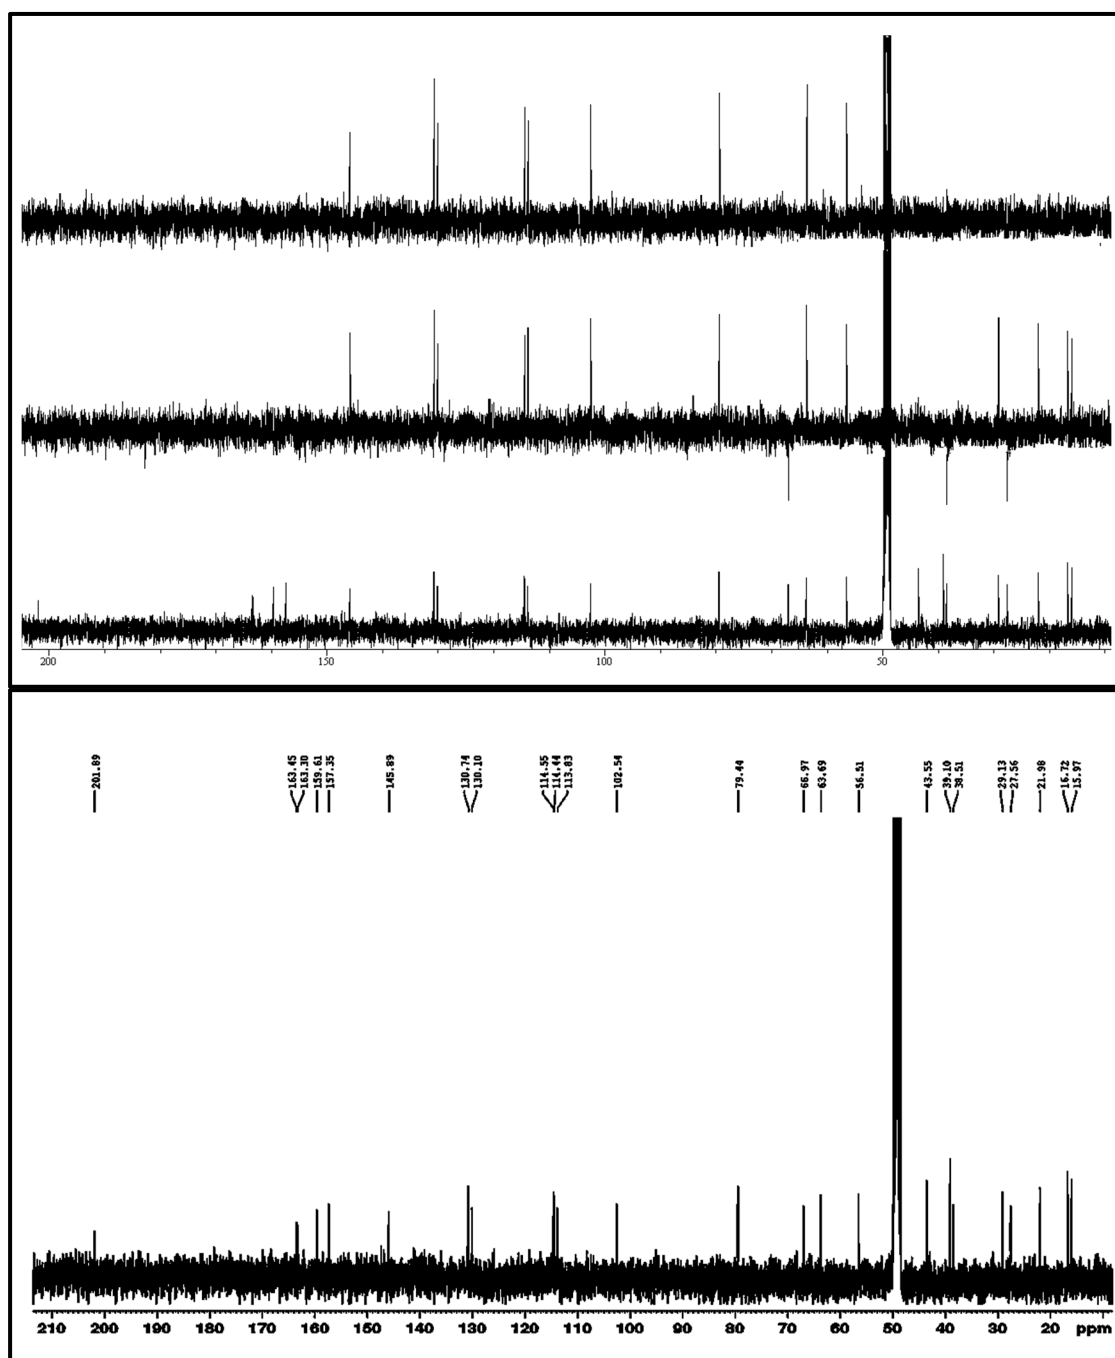

Figure S5.  $^{13}\text{C}$ -NMR, DEPT-135 and DEPT-90 spectra of ligupersin A (2) recorded in  $\text{MeOH-}d_4$ .

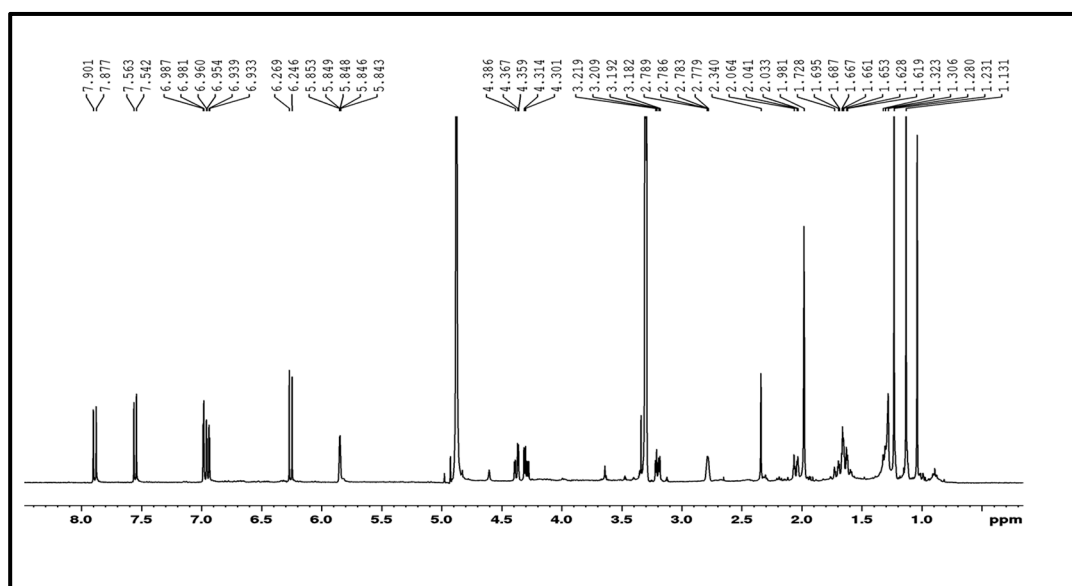

Figure S6.  $^1\text{H-NMR}$  spectrum of ligupersin A (2) recorded in  $\text{MeOH-}d_4$ .

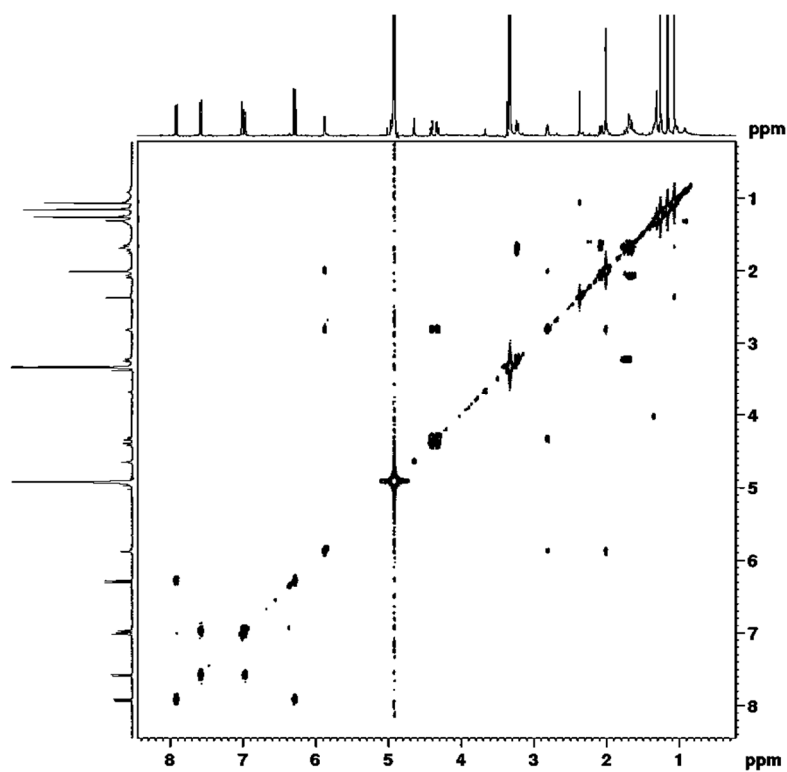

Figure S7. COSY spectrum of ligupersin A (2) recorded in  $\text{MeOH-}d_4$ .

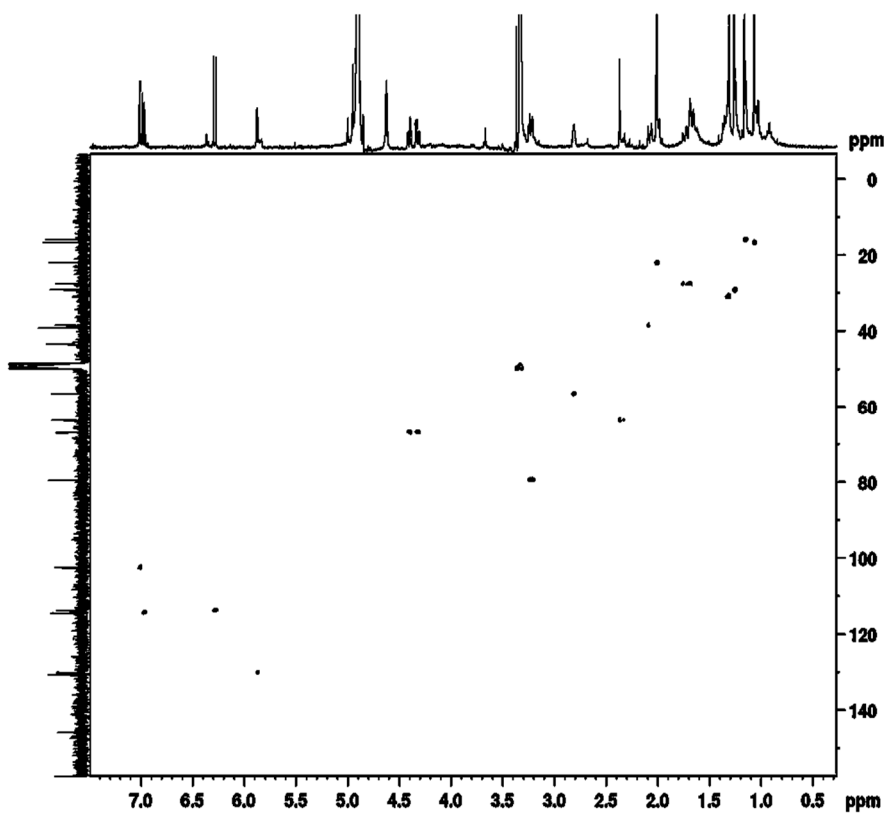Figure S8. HSQC spectrum of ligupersin A (2) recorded in MeOH-*d*<sub>4</sub>.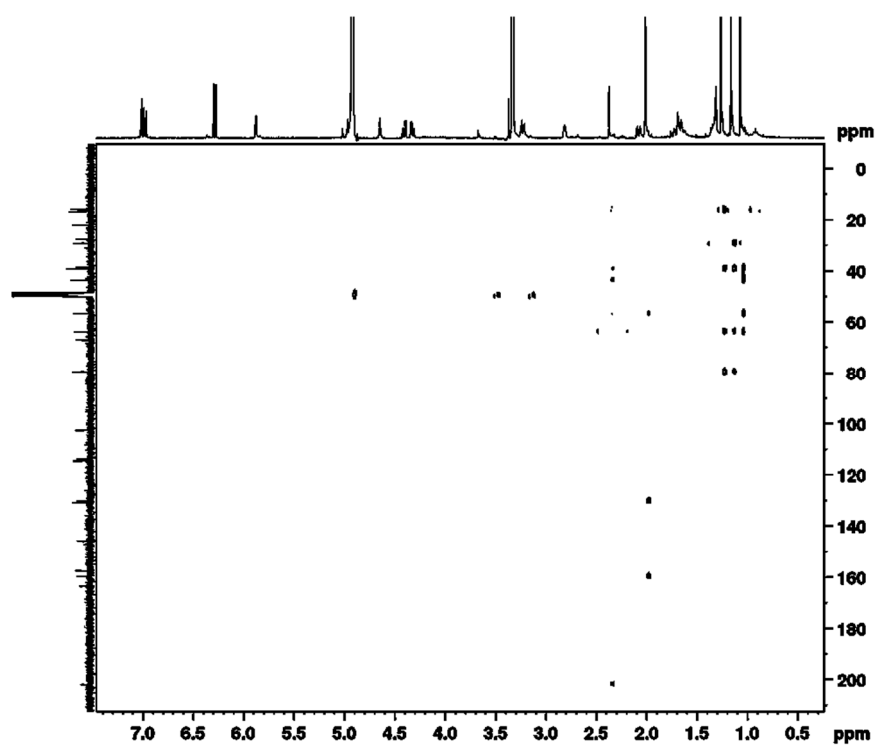Figure S9. HMBC spectrum of ligupersin A (2) recorded in MeOH-*d*<sub>4</sub>.



**Table S3.** <sup>1</sup>H- and <sup>13</sup>C-NMR assignments of 8'-O-acetyl-asacoumarin A (3) recorded in MeOH-*d*<sub>4</sub>.

| Position | $\delta_H$ (ppm); multiplicity; <i>J</i> (Hz) | $\delta_C$ (ppm) |
|----------|-----------------------------------------------|------------------|
| 2        |                                               | 163.4            |
| 3        | 6.21; d; <i>J</i> = 8.5 Hz                    | 113.4            |
| 4        | 7.90; d; <i>J</i> = 9.5 Hz                    | 145.8            |
| 5        | 7.51; d; <i>J</i> = 8.5 Hz                    | 130.5            |
| 6        | 6.90; dd; <i>J</i> = 2.5; 8.0 Hz              | 114.4            |
| 7        |                                               | 163.8            |
| 8        | 6.84; d; <i>J</i> = 2.5                       | 102.6            |
| 9        |                                               | 157.1            |
| 10       |                                               | 114.0            |
| 1'       | 4.64; br d; <i>J</i> = 6.2                    | 66.7             |
| 2'       | 5.50; br t; <i>J</i> = 6.2                    | 123.2            |
| 3'       |                                               | 139.3            |
| 4'       | 2.34; m                                       | 48.3             |
|          | 2.16; m                                       |                  |
| 5'       | 4.51; m                                       | 67.3             |
| 6'       | 5.40; br d; <i>J</i> = 8.2                    | 131.9            |
| 7'       |                                               | 136.4            |
| 8'       | 5.02; t; <i>J</i> = 7.0                       | 80.0             |
|          | 2.33; m                                       |                  |
| 9'       | 2.24; m                                       | 32.8             |
| 10'      | 4.83; overlapped with solvent peak            | 120.3            |
| 11'      |                                               | 135.4            |
| 12'      | 1.60; br s                                    | 12.8             |
| 13'      | 1.70; s                                       | 18.0             |
| 14'      | 1.68; s                                       | 17.4             |
| 15'      | 1.80; br s                                    | 26.0             |
| Ac       | 2.00; s                                       | 21.0             |
|          |                                               | 172.0            |

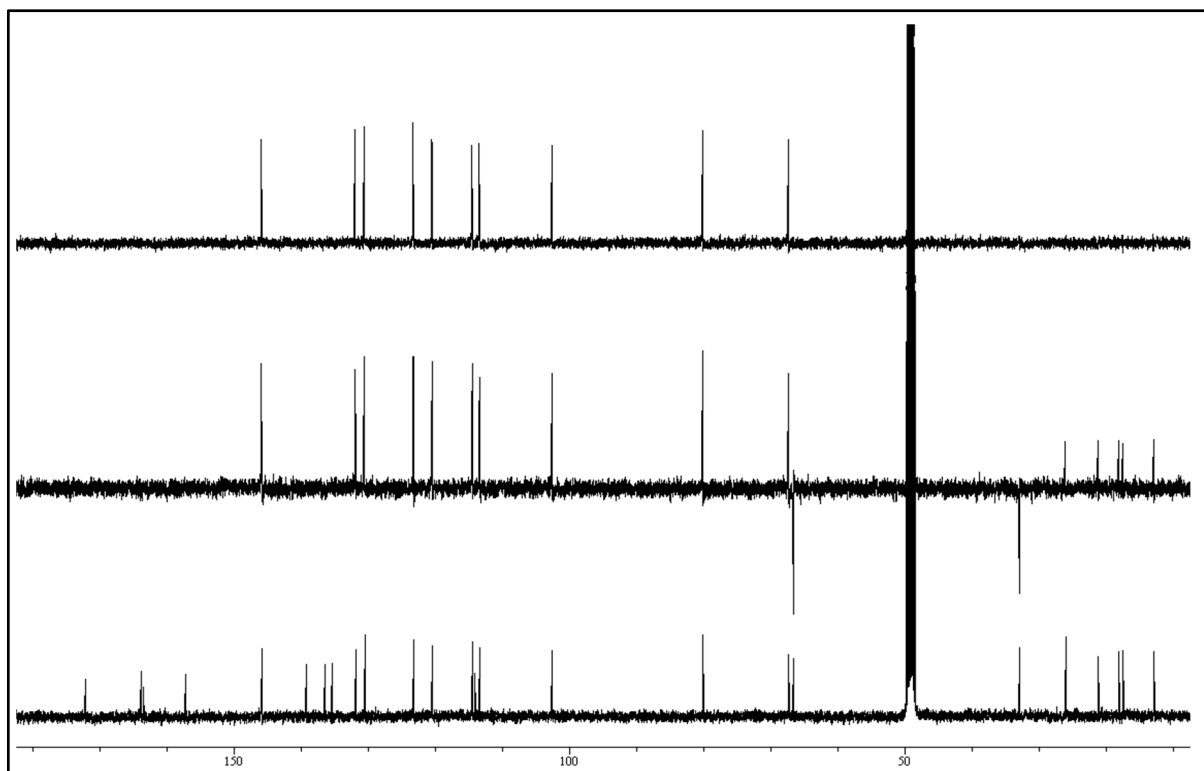

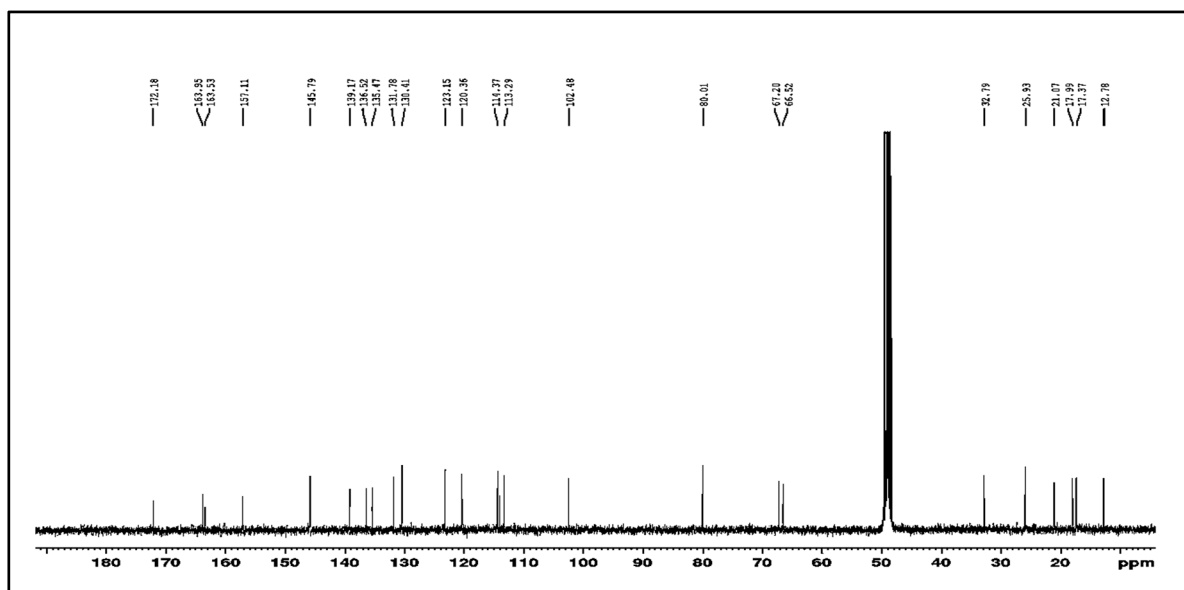

Figure S10.  $^{13}\text{C}$ -NMR, DEPT-135 and DEPT-90 spectra of 8'-O-acetyl-asacoumarin A (3) recorded in  $\text{MeOH-}d_4$ .

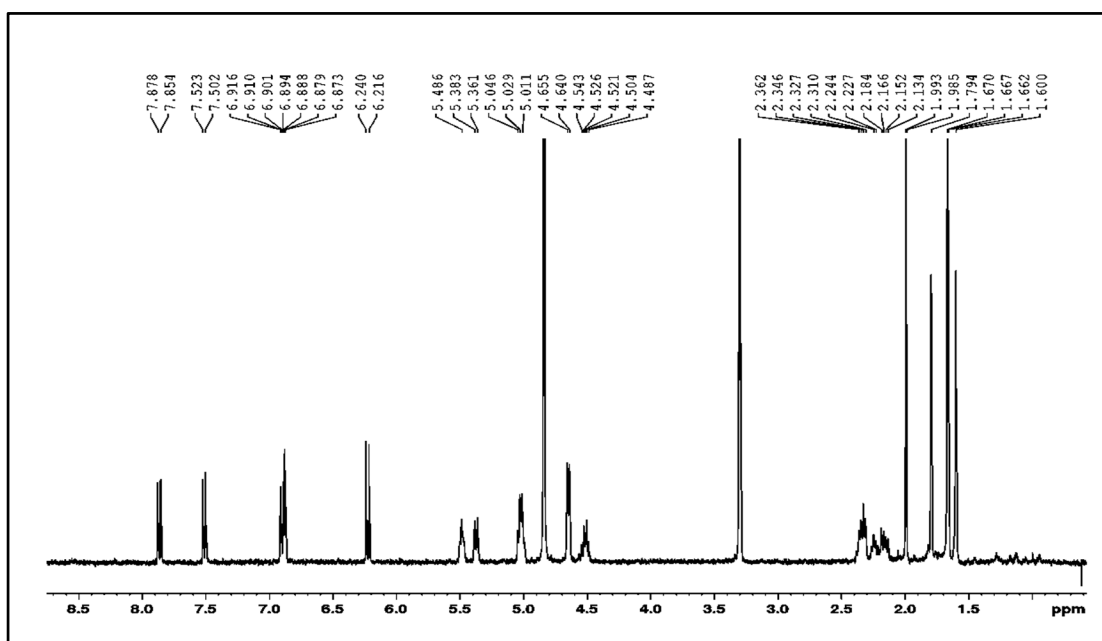

Figure S11.  $^1\text{H}$ -NMR spectrum 8'-O-acetyl-asacoumarin A (3) recorded in  $\text{MeOH-}d_4$ .

**Table S4.**  $^1\text{H}$ - and  $^{13}\text{C}$ -NMR assignments of asacoumarin A (**4**) recorded in  $\text{MeOH-}d_4$ .

| Position | $\delta_{\text{H}}$ (ppm); multiplicity; $J$ (Hz) | $\delta_{\text{C}}$ (ppm) |
|----------|---------------------------------------------------|---------------------------|
| 2        |                                                   | 163.4                     |
| 3        | 6.22; d; $J = 9.5$                                | 113.2                     |
| 4        | 7.88; d; $J = 9.5$                                | 145.8                     |
| 5        | 7.50; d; $J = 8.5$                                | 130.3                     |
| 6        | 6.88; dd; $J = 8.0, 2.5$                          | 114.4                     |
| 7        |                                                   | 163.8                     |
| 8        | 6.85; d; $J = 2.5$                                | 102.2                     |
| 9        |                                                   | 157.1                     |
| 10       |                                                   | 113.9                     |
| 1'       | 4.64; d; $J = 6.4$                                | 66.5                      |
| 2'       | 5.50; br t; $J = 6.2$                             | 123.0                     |
| 3'       |                                                   | 140.1                     |
| 4'       | 2.34; m<br>2.14; m                                | 48.3                      |
| 5'       | 4.51; dd; $J = 15.0, 6.4$                         | 67.4                      |
| 6'       | 5.3; d; $J = 8.2$                                 | 130.4                     |
| 7'       |                                                   | 139.3                     |
| 8'       | 3.89; t; $J = 6.7$                                | 78.5                      |
| 9'       | 2.11; m                                           | 34.9                      |
| 10'      | 5.05; t; $J = 7.0$                                | 121.8                     |
| 11'      |                                                   | 133.9                     |
| 12'      | 1.60; br s                                        | 18.0                      |
| 13'      | 1.66; s                                           | 26.0                      |
| 14'      | 1.8; s                                            | 17.3                      |
| 15'      | 1.60; br s                                        | 11.6                      |

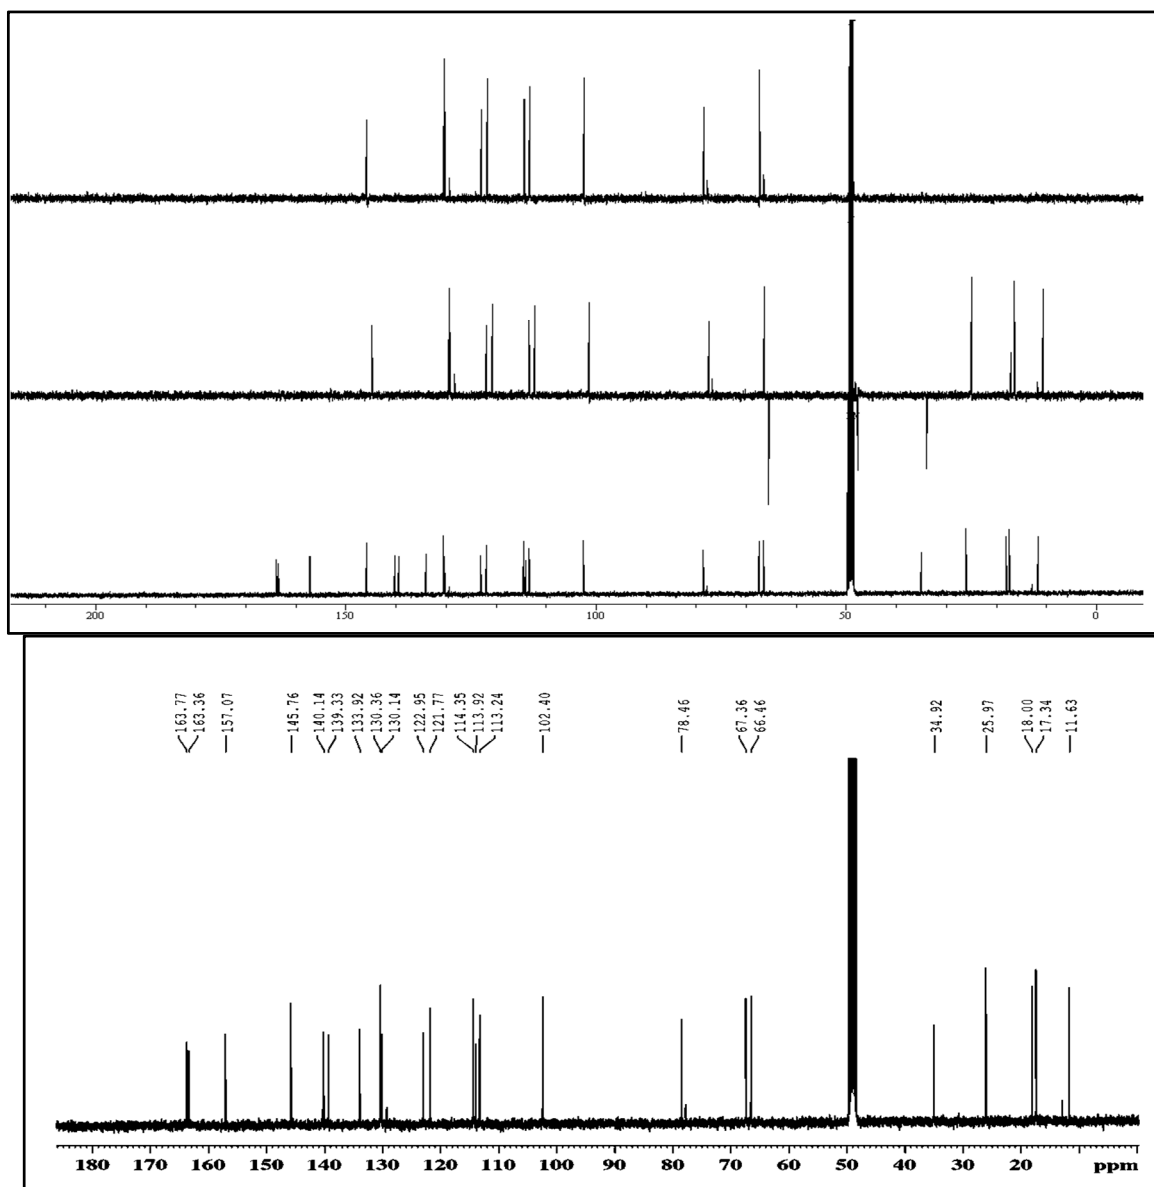

Figure S12.  $^{13}\text{C}$ -NMR, DEPT-135 and DEPT-90 spectra of asacoumarin A (4) recorded in  $\text{MeOH-}d_4$ .

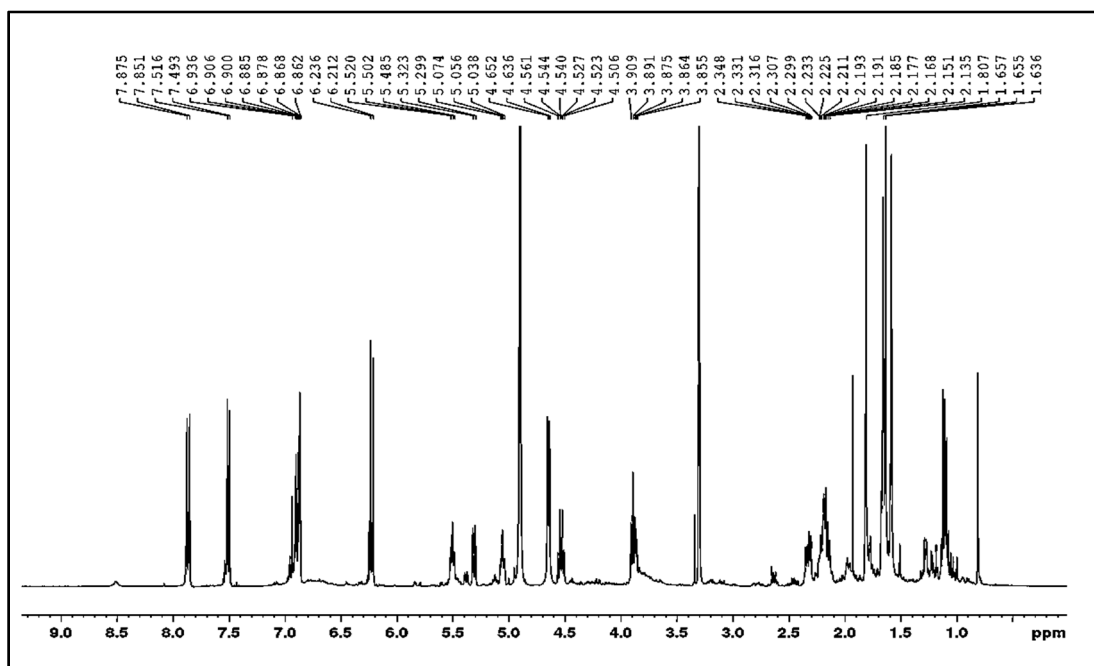

Figure S13. <sup>1</sup>H-NMR spectrum of asacoumarin A (4) recorded in MeOH-*d*<sub>4</sub>.

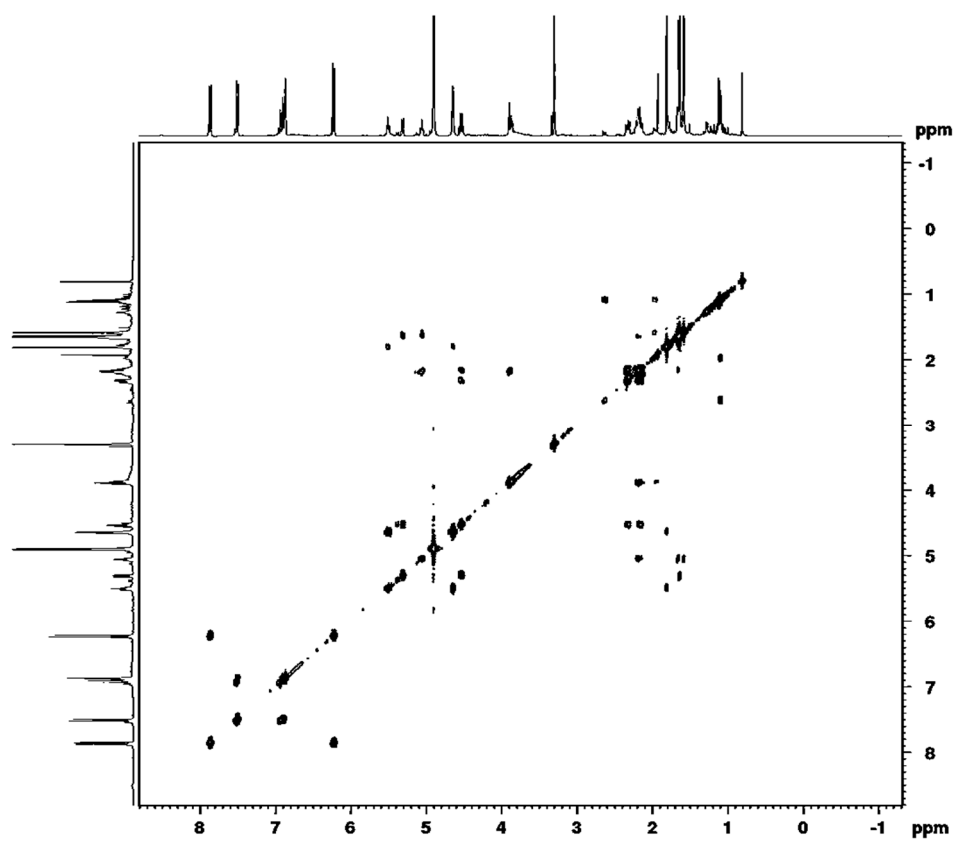

Figure S14. COSY spectrum of asacoumarin A (4) recorded in MeOH-*d*<sub>4</sub>.

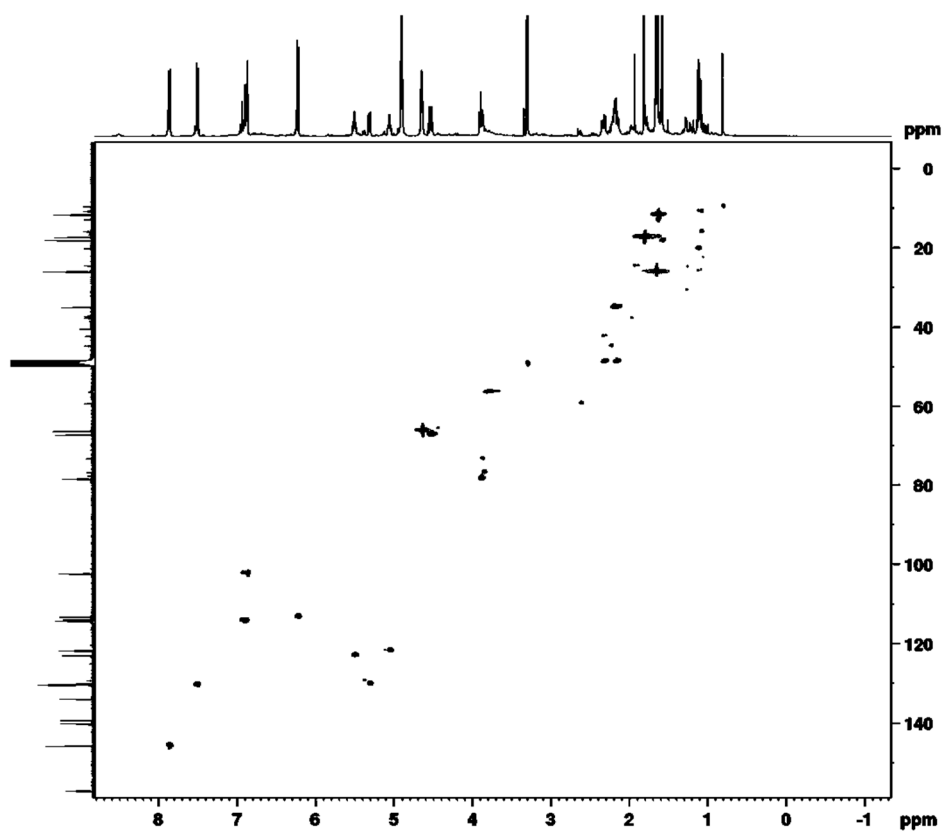

Figure S15. HSQC spectrum of asacoumarin A (4) recorded in MeOH-*d*<sub>4</sub>.

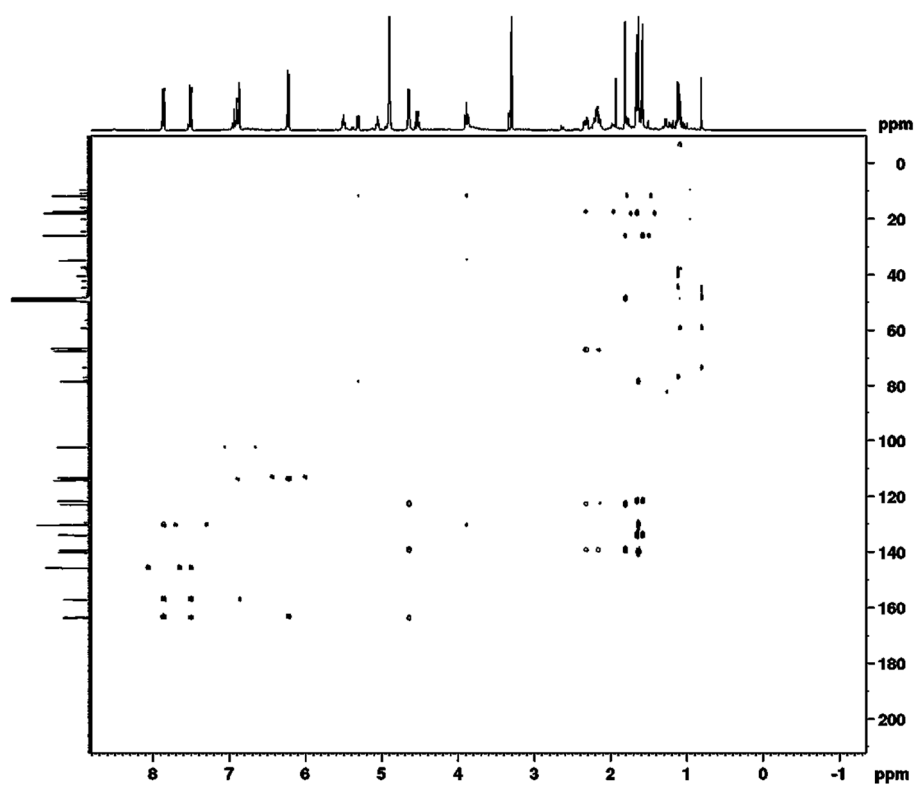

Figure S16. HMBC spectrum of asacoumarin A (4) recorded in MeOH-*d*<sub>4</sub>.

**Table S5.**  $^1\text{H}$ - and  $^{13}\text{C}$ -NMR assignments of 10'R-karatavacinol (5) recorded in MeOH-*d*<sub>4</sub>.

| Position | $\delta_{\text{H}}$ (ppm); multiplicity; $J$ (Hz) | $\delta_{\text{C}}$ (ppm) |
|----------|---------------------------------------------------|---------------------------|
| 2        |                                                   | 163.8                     |
| 3        | 6.22; d; $J = 9.5$                                | 113.8                     |
| 4        | 7.90; d; $J = 9.5$                                | 145.8                     |
| 5        | 7.51; d; $J = 8.5$                                | 130.3                     |
| 6        | 6.91; dd; $J = 8.0, 2.5$                          | 114.4                     |
| 7        |                                                   | 163.4                     |
| 8        | 6.90; d; $J = 2.5$                                | 102.5                     |
| 9        |                                                   | 157.0                     |
| 10       |                                                   | 113.2                     |
| 1'       | 4.65; d; $J = 6.0$                                | 66.6                      |
| 2'       | 5.46; t; $J = 6.0$                                | 120.3                     |
| 3'       |                                                   | 142.8                     |
| 4'       | 2.17; m                                           | 37.8                      |
| 5'       | 1.20; m                                           | 30.8                      |
| 6'       | 5.16; br t; $J = 6.0$                             | 125.0                     |
| 7'       |                                                   | 136.5                     |
| 8'       | 1.32; m                                           | 40.5                      |
| 9'       | 1.70; m                                           | 27.2                      |
| 10'      | 3.21; dd; $J = 10.0, 2.0$                         | 77.7                      |
| 11'      |                                                   | 73.7                      |
| 12'      | 1.10; s                                           | 25.0                      |
| 13'      | 1.13; s                                           | 16.7                      |
| 14'      | 1.61; s                                           | 25.6                      |
| 15'      | 1.77; s                                           | 16.2                      |

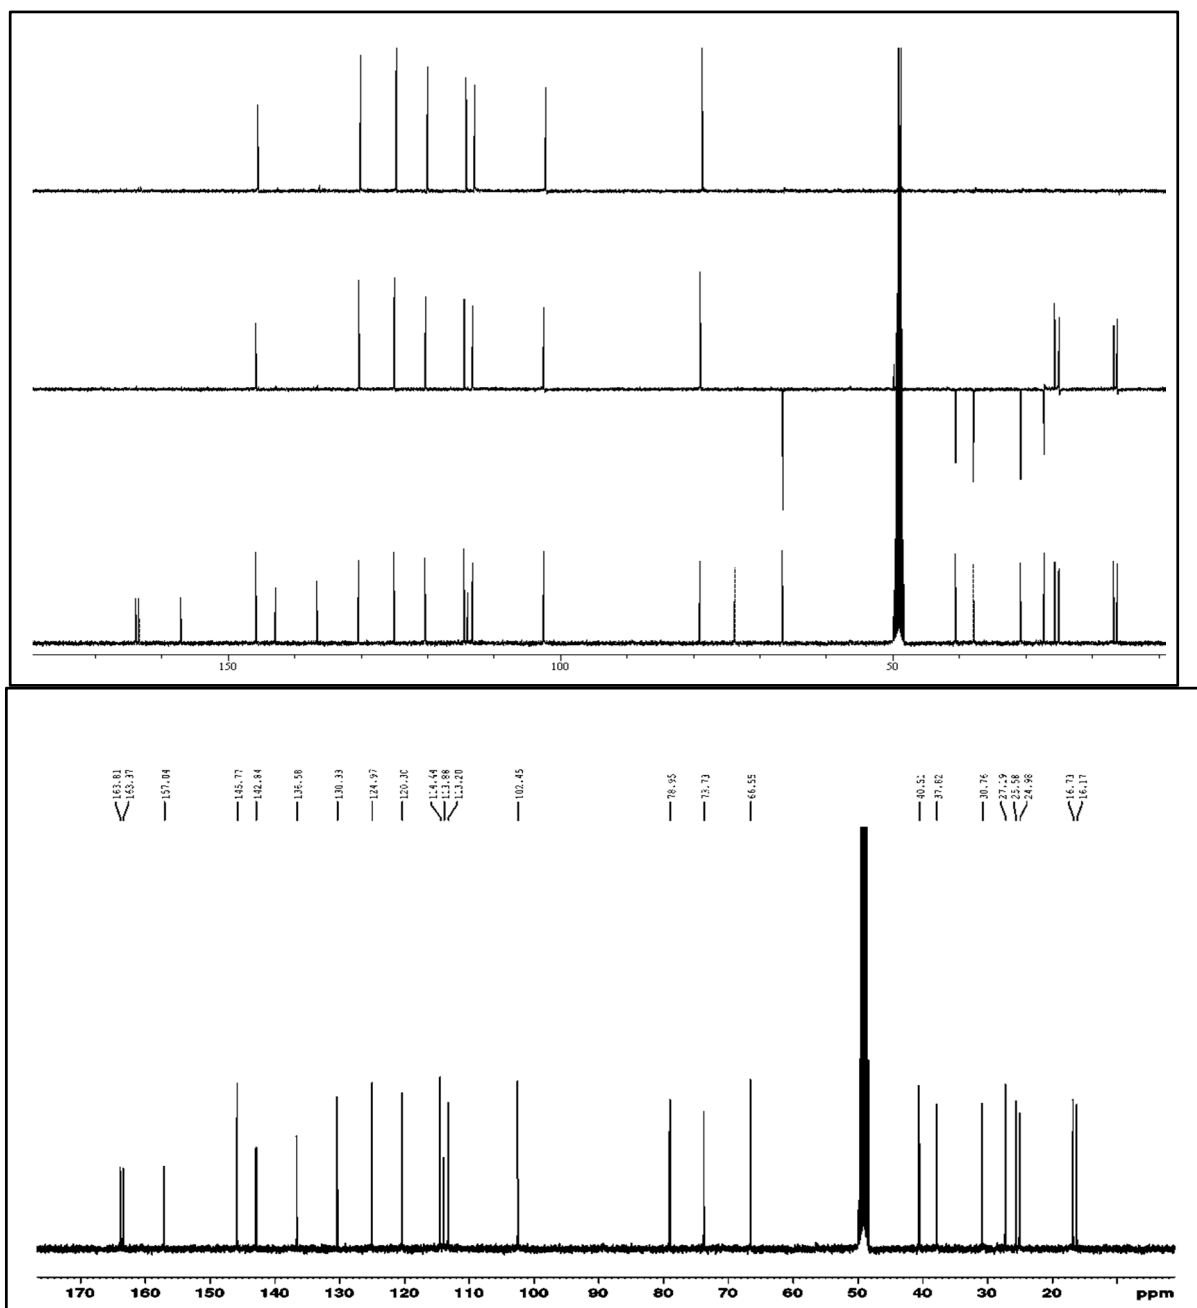

Figure S17.  $^{13}\text{C}$ -NMR, DEPT-135 and DEPT-90 spectra of 10'R-karatavacinol (5) recorded in  $\text{MeOH-}d_4$ .



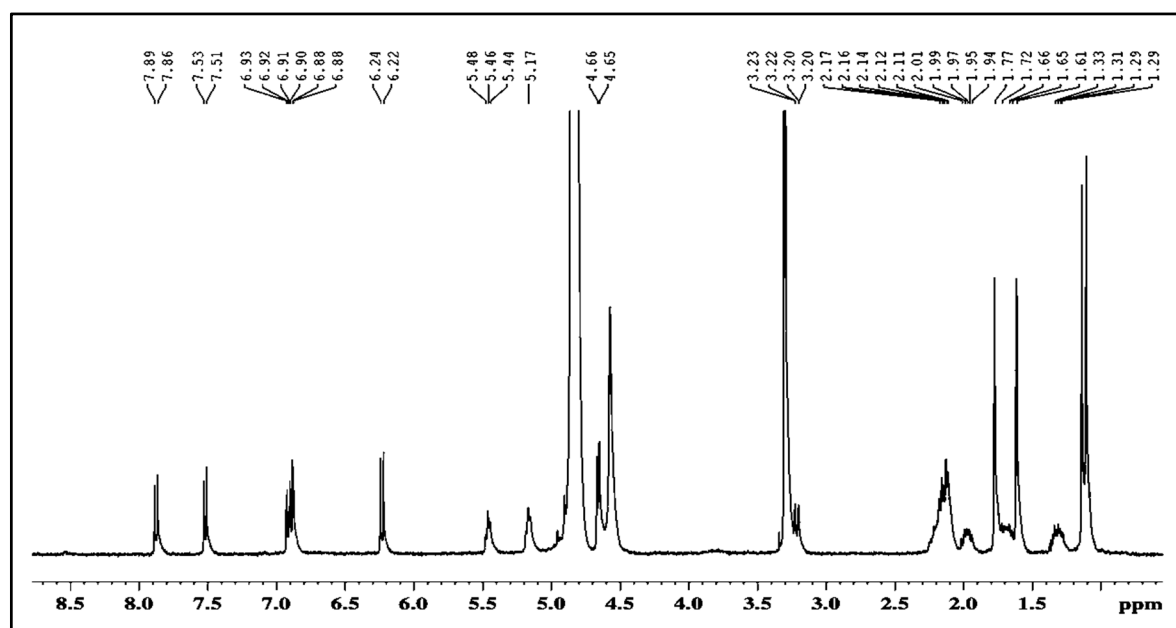

Figure S18.  $^1\text{H}$ -NMR spectrum of 10'R-karatavacinol (5) recorded in  $\text{MeOH-}d_4$ .

Table S6.  $^1\text{H}$ - and  $^{13}\text{C}$ -NMR assignments of 10'R-acetyl- karatavacinol (6) recorded in  $\text{MeOH-}d_4$ .

| Position    | $\delta_{\text{H}}$ (ppm); multiplicity; $J$ (Hz) | $\delta_{\text{C}}$ (ppm) |
|-------------|---------------------------------------------------|---------------------------|
| 2           |                                                   | 164.0                     |
| 3           | 6.23; d; $J = 9.5$                                | 113.2                     |
| 4           | 7.90; d; $J = 9.5$                                | 145.9                     |
| 5           | 7.51; d; $J = 8.5$                                | 130.4                     |
| 6           | 6.91; dd; $J = 8.0, 2.5$                          | 114.5                     |
| 7           |                                                   | 163.5                     |
| 8           | 6.90; d; $J = 2.5$                                | 102.5                     |
| 9           |                                                   | 157.1                     |
| 10          |                                                   | 113.9                     |
| 1'          | 4.66; d; $J = 6.0$                                | 66.6                      |
| 2'          | 5.50; t; $J = 6.0$                                | 120.5                     |
| 3'          |                                                   | 143.0                     |
| 4'          | 2.16–2.05; m                                      | 40.4                      |
| 5'          | 2.16–2.05; m                                      | 27.2                      |
| 6'          | 5.16; br t; $J = 6.0$                             | 125.5                     |
| 7'          |                                                   | 135.7                     |
| 8'          | 1.92; m                                           | 37.4                      |
| 9'          | 1.67; m                                           | 29.0                      |
| 10'         | 4.75; dd; $J = 10.5, 2.0$                         | 80.6                      |
| 11'         |                                                   | 72.8                      |
| 12'         | 1.12; s                                           | 25.7                      |
| 13'         | 1.13; s                                           | 25.9                      |
| 14'         | 1.60; s                                           | 16.0                      |
| 15'         | 1.77; s                                           | 16.7                      |
| OAc (C-10') | 2.0; s                                            | 21.1<br>172.8             |

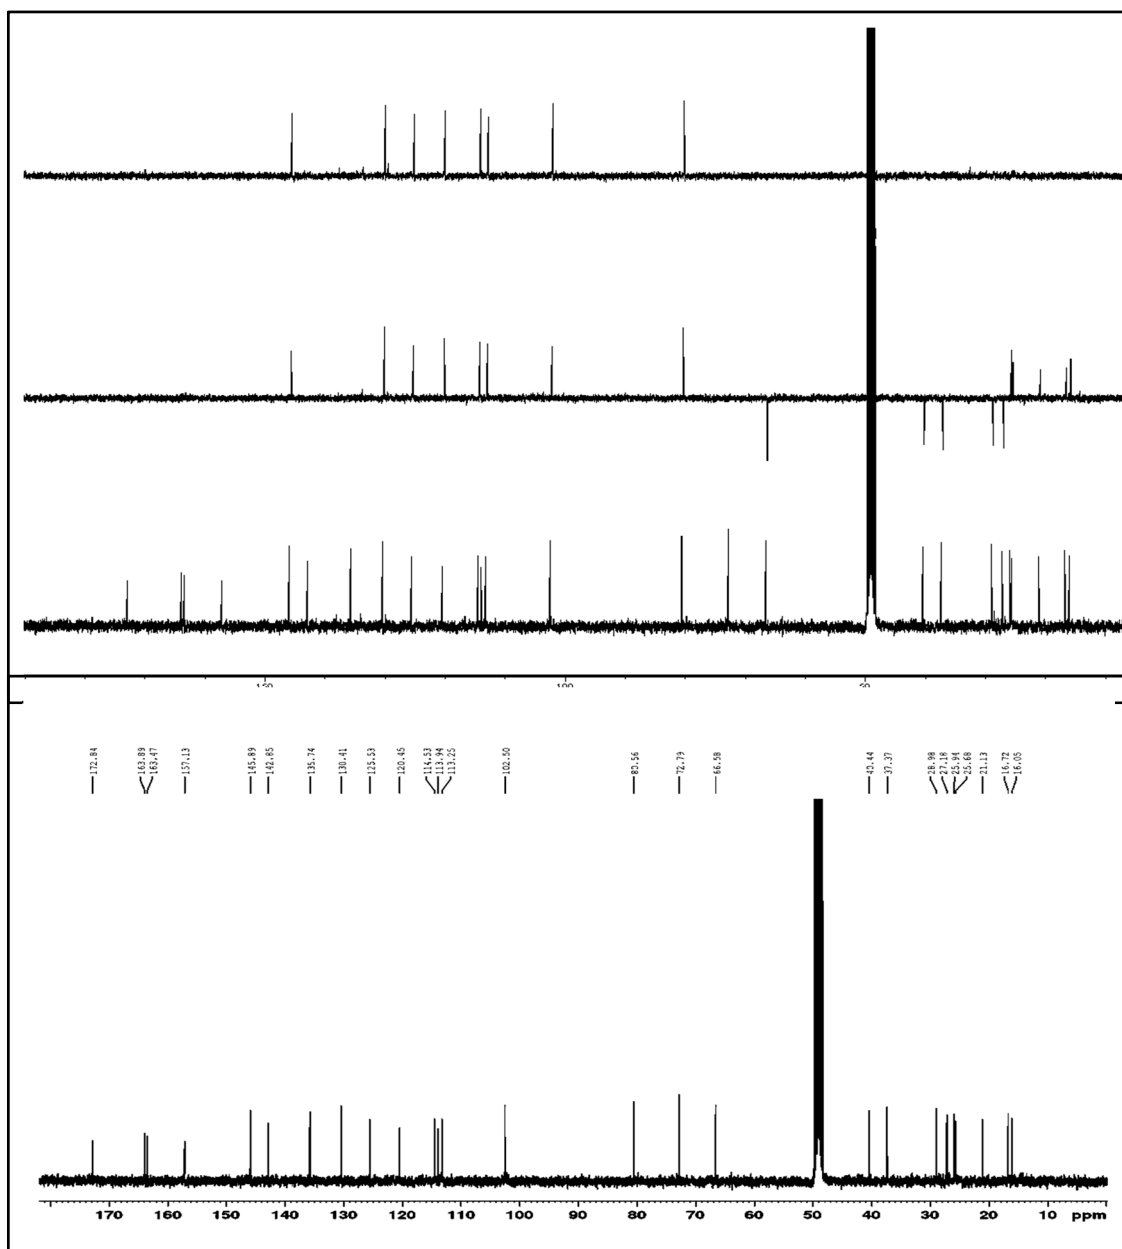

**Figure S19.**  $^{13}\text{C}$ -NMR, DEPT-135 and DEPT-90 spectra of 10'R-acetyl-karatavacicol (6) recorded in  $\text{MeOH-}d_4$ .

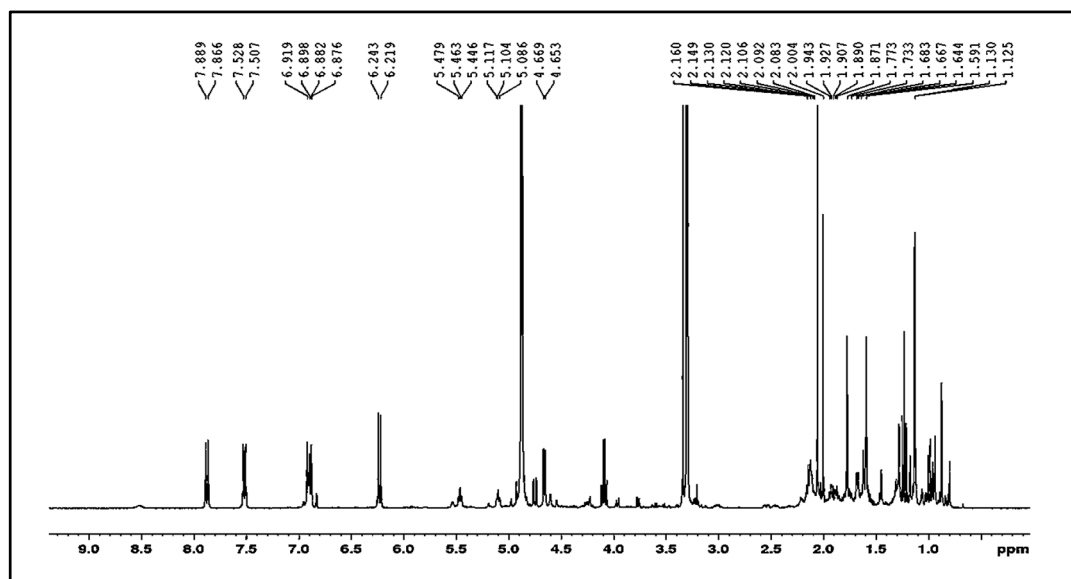

Figure S20. <sup>1</sup>H-NMR spectrum of 10'R-acetyl-karatavacinol (6) recorded in MeOH-*d*<sub>4</sub>.

## References

1. Matsuura, N.; Aradate, T.; Sasaki, C.; Kojima, H.; Ohara, M.; Hasegawa, J. Screening system for the Maillard reaction inhibitor from natural product extracts. *J. Health Sci. Surveillance Syst.* **2002**, *48*, 520–526.
2. Peng, X.; Zheng, Z.; Cheng, K.W.; Shan, F.; Ren, G.X.; Chen, F.; Wang, M. Inhibitory effect of mungbean extract and its constituents vitexin and iso-vitexin on the formation of advanced glycation end products. *Food Chem.* **2007**, *106*, 475–481.
